# Supplementary material for: Relationship between anaemia, coagulation parameters during pregnancy and postpartum haemorrhage at childbirth: a prospective cohort study
Source: PubMed Central journal article supplement (PMC8491293; doi:10.1136/bmjopen-2021-050815), 2021-10-03

**Table-S1: Traceability of Assays**

| SI No | Name of test                         | Calibrator traceability (reference material/reference method)                                                     | Units                | Typical Calibrator value | Calibrator uncertainty of measurement                   |
|-------|--------------------------------------|-------------------------------------------------------------------------------------------------------------------|----------------------|--------------------------|---------------------------------------------------------|
| 1     | Haemoglobin                          | 1:250 dilution in NCCLS2 recommended reagent for the hemiglobincyanide (cyanmethemoglobin)                        | g/dl                 | 12.58                    | 1.00%                                                   |
| 2     | Hematocrit                           | Calculated                                                                                                        | %                    | calculated               | NA                                                      |
| 3     | Platelets                            | A 1:101 dilution is made using a 20 µL TC pipette and 2 mL of 1% filtered ammonium oxalate (CLSI/ formerly NCCLS) | thou/mm <sup>3</sup> | 214.1                    | 6.00%                                                   |
| 4     | Serum Ferritin                       | WHO 3rd International Standard 94/572                                                                             | ng/ml                | Low 5.44<br>High 953     | Low 19.5<br>High 9.3                                    |
| 5     | Haemoglobin electrophoresis          | NGSP Certification for A2/F                                                                                       | %                    | HbF-6.6 % and HbA2-6.7 % | HbF- Low- NA<br>High 1.8 %<br>HbA2- Low-NA, High- 3.6 % |
| 6     | D-Dimer                              | Pre-calibrated                                                                                                    | mg/L FEU             | NA                       | NA                                                      |
| 7     | Fibrinogen, Clotting activity        | WHO                                                                                                               | mg/dl                | 269                      | 2.7%                                                    |
| 8     | International Normalized Ratio (INR) | Calculated                                                                                                        |                      |                          |                                                         |

NGSP - National Glycohemoglobin Standardization Program; CLSI – Clinical and Laboratory Standards Institute; HbF – Fetal haemoglobin; HbA2 - Haemoglobin Subunit Alpha 2; NA - Not applicable; WHO – World Health Organisation

**Table-S2: Assay Information and performance characteristics**

| SI No | Name of test                         | System used for the analysis                                                                                                          | Method information (supplier/ method)  | Manufacturers ' Analytical Range  | Laboratory Reportable range      | Normal Reference range        | Biological variation    | Uncertainty of measurement | QC material             | External Quality Assurance |
|-------|--------------------------------------|---------------------------------------------------------------------------------------------------------------------------------------|----------------------------------------|-----------------------------------|----------------------------------|-------------------------------|-------------------------|----------------------------|-------------------------|----------------------------|
| 1     | Haemoglobin                          | DxH -800 (Beckman Coulter, Fullerton, CA, USA)                                                                                        | Photometric                            | 0.0-99.9g/dl                      | 1.25                             | 13.-17.0g/dl (adult male)     | 2.1                     | 4.0                        | Coulter 6c cell control | CAP                        |
| 2     | Hematocrit                           | DxH -800 (Beckman Coulter, Fullerton, CA, USA)                                                                                        | Automated calculation                  | 0.99.9                            | NA                               | 40-50% (adult male)           | 1.9                     | 4.0                        | Coulter 6c cell control | CAP                        |
| 3     | Platelets                            | DxH -800 (Beckman Coulter, Fullerton, CA, USA)                                                                                        | Impedance/ Coulter principle           | 0.7000                            | 10-1000                          | 150-450thou/mm3 (adult male)  | 2.9                     | 6.0                        | Coulter 6c cell control | CAP                        |
| 4     | Serum Ferritin                       | Siemens ADVIA Centaur                                                                                                                 | Chemiluminescence Immunoassay (CLIA)   | 0.5 – 1650 ng/ml                  | <0.5, >16500                     |                               | 14.2                    | 22.5                       | BIO-RAD                 | CAP PT                     |
| 5     | Haemoglobin electrophoresis          | Variant II Hemoglobin testing system (Bio-Rad, Hercules, CA, USA)                                                                     | High Performance Liquid Chromatography | HbF-1.3-44.3 %<br>HbA2-1.6-18.7 % | HbF-1.3-99.8%<br>HbA2-1.6-18.7 % | HbF- <1.5 %<br>HbA2-1.5-3.5 % | HbF-5.6 %<br>HbA2-4.4 % | HbF-10.97 %<br>HbA2-8.62 % | BIO-RAD                 | CAP                        |
| 6     | D-Dimer                              | STA-R Evolution (Diagnostica Stago, Cedex, France)                                                                                    | Latex-enhanced immunoturbidimetry      | 0.22-20.0                         | 0.22-20.0                        | < 0.50                        | 10.4                    | 20.38                      | Stago                   | CAP                        |
| 7     | Fibrinogen, Clotting activity        | Sysmex CS5100 analyzer (Sysmex Corporation, Kobe, Japan)                                                                              | Photo optical clot detection           | 30 -1400                          | 50 -1200                         | 200 - 400                     | 13.8                    | 27.05                      | Siemens                 | CAP                        |
| 8     | International Normalized Ratio (INR) | Calculated from Prothrombin time measured by Photo-optical clot Detection on Sysmex CS5100 analyzer (Sysmex Corporation, Kobe, Japan) | Calculated                             | Calculated                        | NA                               | 0.9 – 1.1                     | NA                      | NA                         | Siemens                 | CAP                        |

INR: International Normalized Ratio; NABL: National Accreditation Board for Testing and Calibration; CAP: College of American Pathologists; CAP PT - College of American Pathologists Proficiency Testing programme; HbF: Fetal haemoglobin; HbA2: Haemoglobin Subunit Alpha; QC: Quality Control; NA - Not applicable

**Table-S3: Sample size calculations**

| Coagulation parameter | Concentration in general pregnant population Mean (SD) | Sample required for a range of expected difference in mean concentration of the blood parameters between the groups of anaemia in either direction |       |                |       |                |       |
|-----------------------|--------------------------------------------------------|----------------------------------------------------------------------------------------------------------------------------------------------------|-------|----------------|-------|----------------|-------|
|                       |                                                        | 10% difference                                                                                                                                     |       | 20% difference |       | 30% difference |       |
|                       |                                                        | n1                                                                                                                                                 | Total | n1             | Total | n1             | Total |
| D-Dimer (mg/dl)       | 0.11 (0.573) <sup>7</sup>                              | 514                                                                                                                                                | 1028  | 129            | 258   | 58             | 116   |
| Fibrinogen (mg/dl)    | 379 (0.78) <sup>8</sup>                                | 90                                                                                                                                                 | 180   | 23             | 46    | 10             | 20    |

n1 – women with haemoglobin concentration <10g/dl; n2 – women with haemoglobin concentration ≥10g/dl

**Table-S4: Association of coagulation parameters with haematocrit at third trimester**

| Independent variables | Outcome variables                |                                 |
|-----------------------|----------------------------------|---------------------------------|
|                       | D-Dimer                          |                                 |
|                       | Unadjusted coefficients (95% CI) | Adjusted* coefficients (95% CI) |
| Haematocrit (HCT)     | 0.99 (0.98 to 0.99)              | 0.99 (0.98 to 0.99)             |
| HCT ≥30%              | 1 (ref)                          | 1 (ref)                         |
| HCT <30%              | 1.13 (1.03 to 1.25)              | 1.13 (1.03 to 1.24)             |
|                       | Fibrinogen                       |                                 |
|                       | Unadjusted coefficients (95% CI) | Adjusted* coefficients (95% CI) |
| Haematocrit (HCT)     | 4.57 (3.37 to 5.77)              | 5.69 (4.51 to 6.88)             |
| HCT ≥30%              | 0 (Ref)                          | 0 (Ref)                         |
| HCT <30%              | -58.3 (-75.4 to -41.1)           | -68.1 (-84.8 to -51.3)          |
|                       | D-Dimer/Fibrinogen ratio         |                                 |
|                       | Unadjusted coefficients (95% CI) | Adjusted* coefficients (95% CI) |
| Haematocrit (HCT)     | 0.98 (0.97 to 0.99)              | 0.97 (0.96 to 0.98)             |
| HCT ≥30%              | 1 (ref)                          | 1 (ref)                         |
| HCT <30%              | 1.35 (1.19 to 1.52)              | 1.39 (1.24 to 1.56)             |
|                       | INR                              |                                 |
|                       | Unadjusted coefficients (95% CI) | Adjusted* coefficients (95% CI) |
| Haematocrit (HCT)     | 0.99 (0.99 to 1.00)              | 0.99 (0.99 to 1.00)             |
| HCT ≥30%              | 1 (ref)                          | 1 (ref)                         |
| HCT <30%              | 1.02 (0.98 to 1.06)              | 1.05 (1.01 to 1.09)             |
|                       | Platelets                        |                                 |
|                       | Unadjusted coefficients (95% CI) | Adjusted* coefficients (95% CI) |
| Haematocrit (HCT)     | -0.38 (-1.07 to 0.30)            | -0.89 (-1.59 to -0.18)          |
| HCT ≥30%              | 0 (ref)                          | 0 (ref)                         |
| HCT <30%              | 4.84 (-4.93 to 14.61)            | 11.32 (1.42 to 21.23)           |

\*Adjusted for gestational age, maternal age, PIH, pre-existing medical problems and hospital-code.

**Figure-S1: Flow chart showing the study population**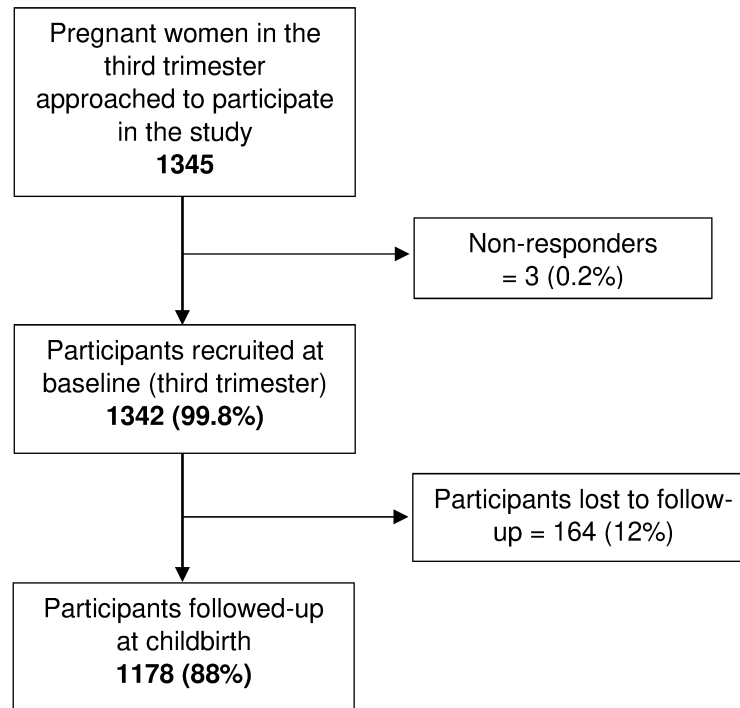**Figure S2: Predicted probability of PPH observed by fitting an interaction between Hb and D-dimer**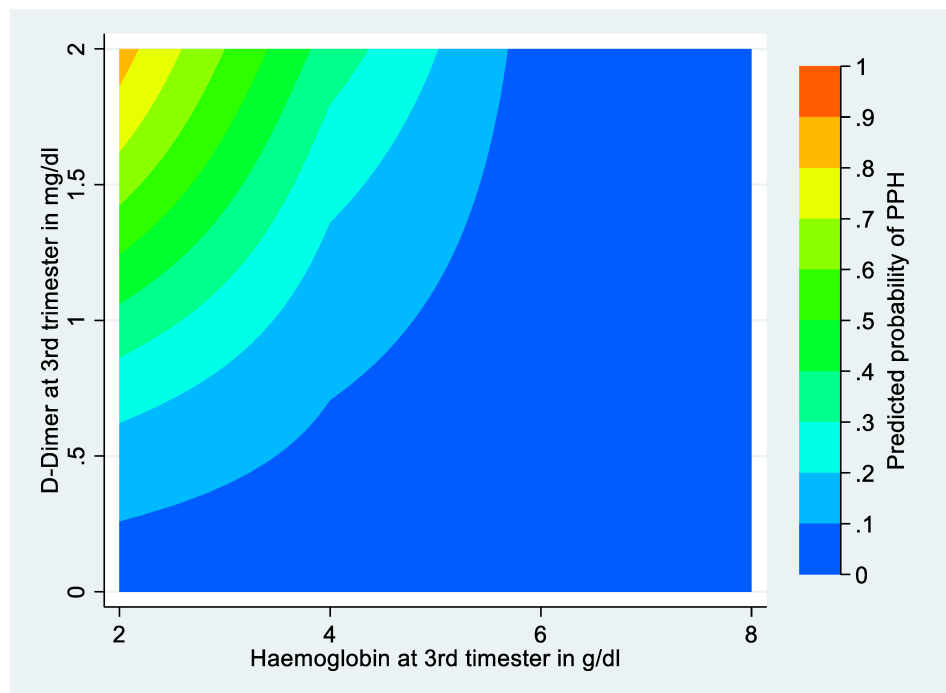

Supplement: bmjopen-2021-050815supp001.pdf [file bmjopen-2021-050815supp001.pdf]
